# Supplementary material
Source: publisher figshare collection journal article supplement (https://acs.figshare.com/ndownloader/files/3901663)

## F) Ethylene

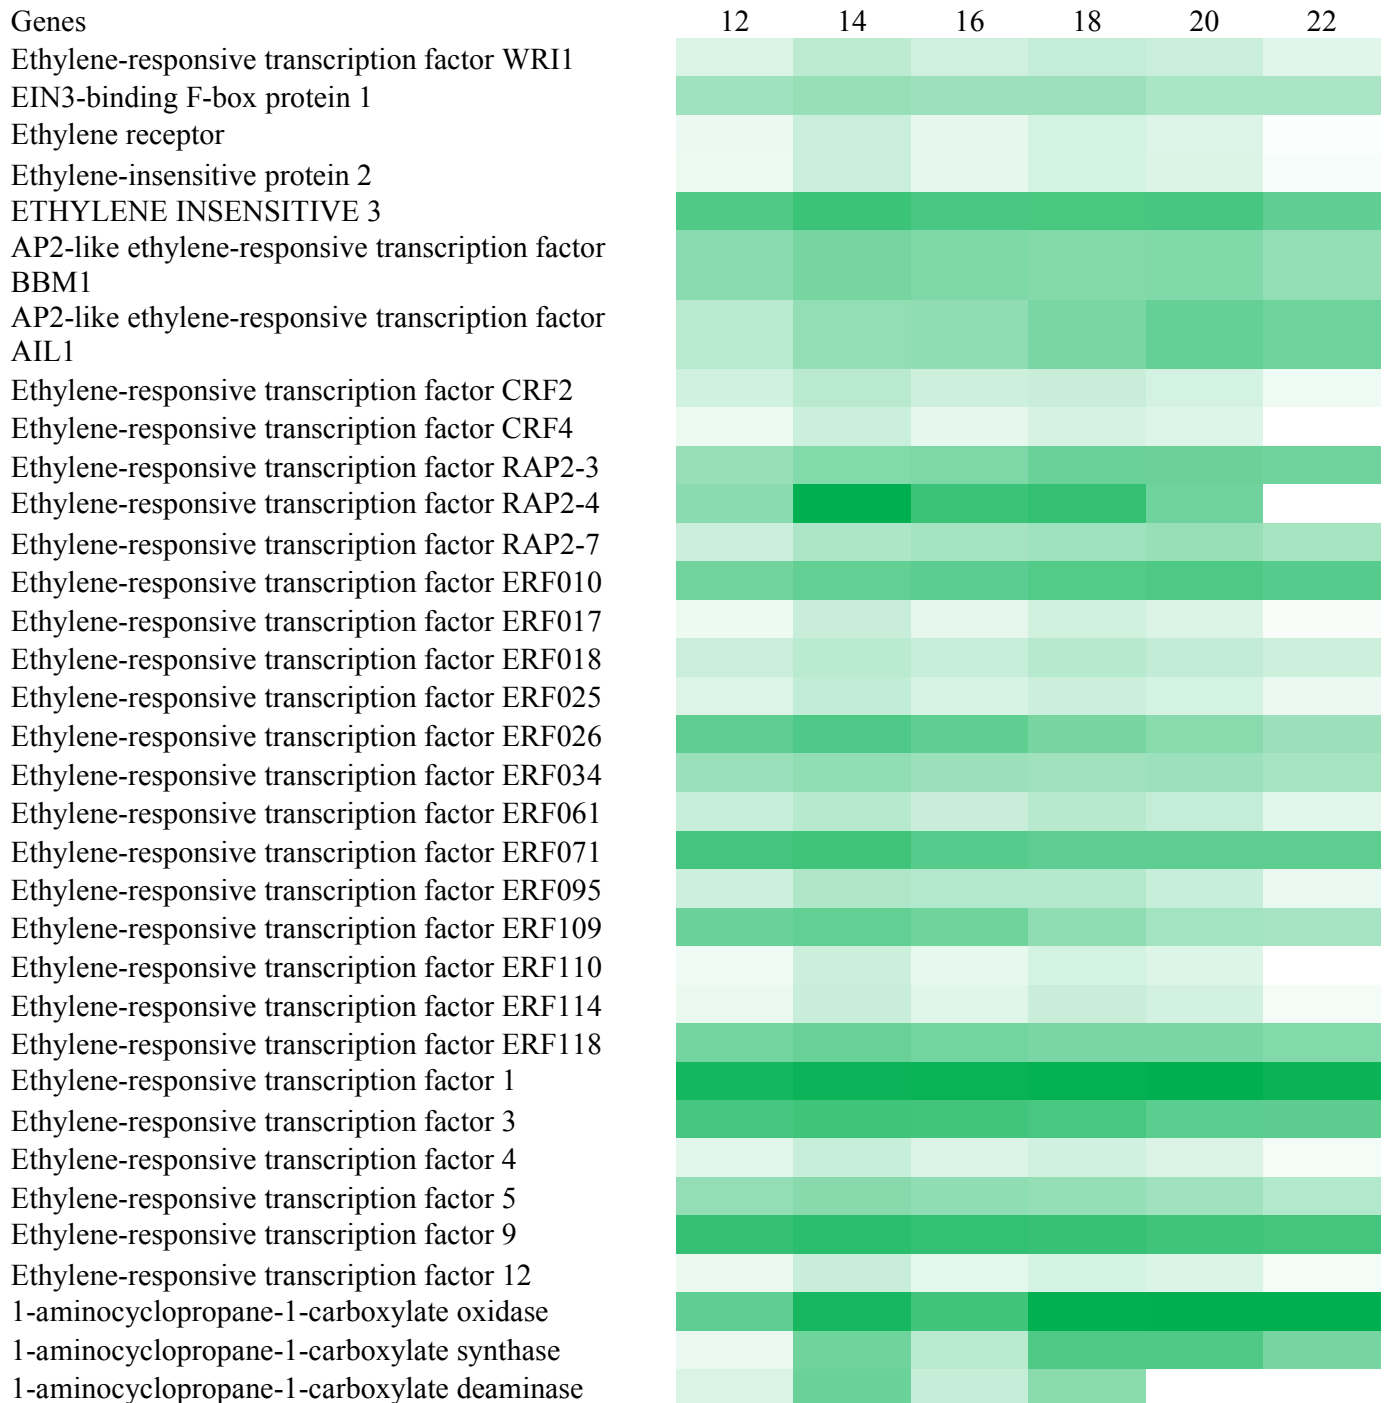

### G) Brassinosteroid

Genes

Brassinosteroid-regulated protein  
Brassinosteroid insensitive 1-associated receptor  
kinase 1  
Brassinosteroid LRR receptor kinase

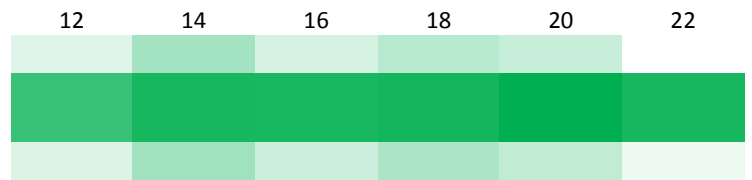

Supplement: Supplementary file 1 [file 3901663]
